# Supplementary material for: Gender Differences in Smoking Initiation and Cessation Associated with the Intergenerational Transfer of Smoking across Three Generations: The Nagahama Study
Source: MDPI journal article supplement (doi:10.3390/ijerph19031511), 2022-01-28
Supplement: s1 [file s1]

## Questionnaire on specific health examination (Question relevant to the subject)

Gender                                      1. Male    2. Female

- How old are you?                      \_\_\_\_\_ years old

- Are you a current regular smoker?

- A “current regular smoker” is a person who has smoked a total of 100 or more cigarettes or smoked for 6 months or longer and has been smoking for the last one month.

1. Yes (Current)    2. Ever    3. Never

(If you answered 1. Yes (Current),)

- What is the number of cigarettes smoked per day (CPD) at the present?  
\_\_\_\_\_ cigarettes

(If you answered 1. Yes (Current) or 2. Ever, )

- How long have or had you been smoking?  
\_\_\_\_\_ Years

- When did you start smoking?  
\_\_\_\_\_ years old

- What was the number of cigarettes smoked per day (CPD) at the time of smoking initiation?  
\_\_\_\_\_ cigarettes

- Whether or not your family members smoke or smoked?

✓ Mother                      1. Yes    0. No

If mother was chosen as a smoker, please check her smoking status during pregnancy.                      1. Yes    0. No    2. unknown

✓ Father                      1. Yes    0. No

✓ Grandmother                      1. Yes    0. No

✓ Grandfather                      1. Yes    0. No

✓ Sib-lings                      1. Yes    0. No

✓ Spouse                      1. Yes    0. No

- How often do you drink alcohol (Sake, shochu [distilled spirits], beer, liquor, etc.)?
  1. Everyday
  2. Sometimes
  3. Rarely drink (can't drink)
  
- How much do you drink a day, in terms of glasses of refined Japanese Sake? (A glass [180mL] of refined Sake (rice wine) is equivalent to a medium bottle [500mL] of beer, 110mL of shochu (alcohol content 25 percent), a glass [double, 60mL] of whisky, and two glasses [240mL] of wine)
  1. <1 (less than 180mL)
  2. ≥1 and <2 (180-360mL)
  3. ≥2 and <3 (360-540mL)
  4. ≥3 (more than 540mL)
